# Supplementary material for: Autophagy Inhibition with Chloroquine Increased Pro-Apoptotic Potential of New Aziridine-Hydrazide Hydrazone Derivatives against Glioblastoma Cells
Source: MDPI journal article supplement (doi:10.3390/cells12141906), 2023-07-21

## Supplementary materials

**Table S1**

Influence of tested compounds on progress of apoptotic process and viability of GB cells after 24-hour treatment

| Treatment mode | G16          |             |                  | G114         |             |                  | G116         |             |                  |
|----------------|--------------|-------------|------------------|--------------|-------------|------------------|--------------|-------------|------------------|
|                | Early apopt. | Late apopt. | Viable cells [%] | Early apopt. | Late apopt. | Viable cells [%] | Early apopt. | Late apopt. | Viable cells [%] |
| Control        | 1.86 ±0.13   | 7.69±1.05   | 88.2±4.69        | 3.67±0.71    | 8.45±0.43   | 85.59±4.78       | 0.86±0.10    | 7.47±0.53   | 87.06±3.36       |
| ARA12          | 10.59±0.74   | 15.34±1.4   | 71.76±1.88       | 1.23±0.14    | 6.38±0.48   | 89.46±0.54       | 4.38±1.42    | 5.95±1.15   | 85.59±1.49       |
| ARA13          | 15.39±2.44   | 13.7±1.27   | 69.17±3.85       | 3.84±0.35    | 5.53±0.56   | 88.37±1.2        | 2.77±0.81    | 5.16±0.4    | 89.14±0.91       |

**Table S2**

Comparison of percentage of apoptotic cells after combined and single treatment mode (results of statistical analysis for individual tumors; *p* values).

| Adjusted <i>p</i> values |     | TMZ vs TMZ+Inh       | ARA12 vs ARA12+Inh   | ARA13 vs ARA13+Inh   |
|--------------------------|-----|----------------------|----------------------|----------------------|
| G114                     | 48h | 0.038                | 0.0009               | 0.0004               |
|                          | 96h | 0.031                | 0.0134               | ns ( <i>p</i> >0.05) |
| G116                     | 48h | 0.0019               | 0.0002               | <0.0001              |
|                          | 96h | 0.0004               | <0.0001              | 0.0093               |
| G16                      | 48h | 0.0041               | <0.0001              | 0.0066               |
|                          | 96h | ns ( <i>p</i> >0.05) | ns ( <i>p</i> >0.05) | 0.0066               |

**Figure S1**

Results of Western blot analysis for LC3 protein (uncropped membranes).

**G 116**

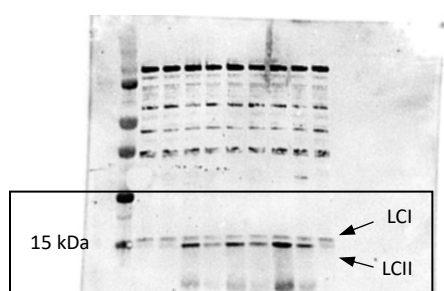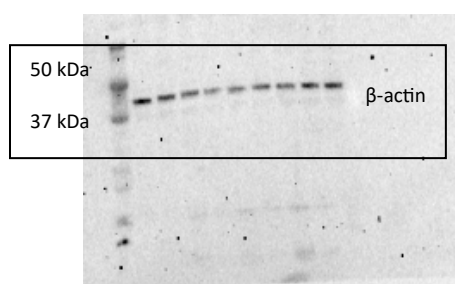

**G16**

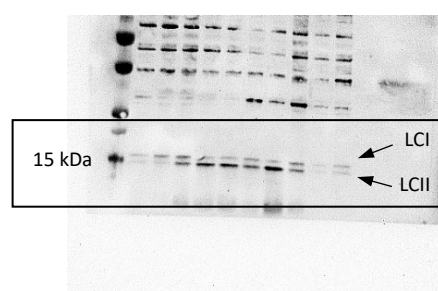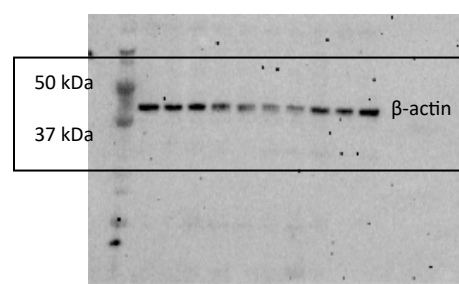

**Figure S2**

Results of apoptosis assay performed via FACS analysis for NHA treated with ARA12 [150 $\mu$ g/mL].

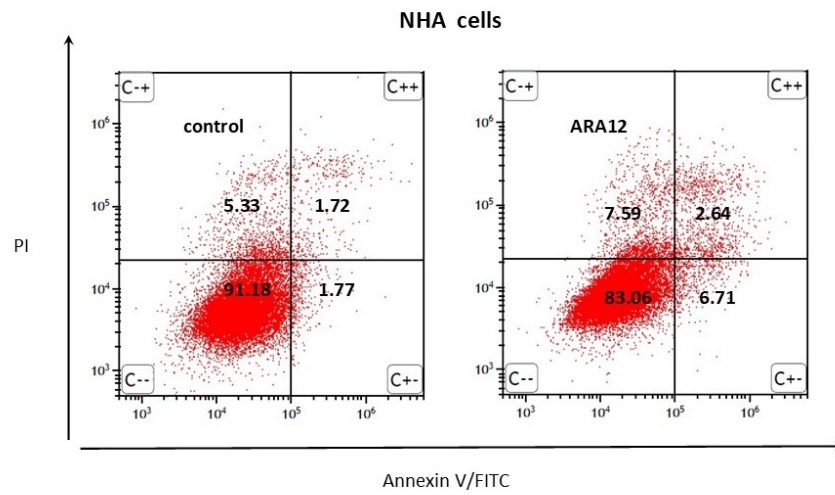

Supplement: s1 [file s1]
